# Supplementary material for: Identification of Potent EGFR Inhibitors from TCM Database@Taiwan
Source: PLOS journal article supplement (doi:10.1371/journal.pcbi.1002189), 2011-10-13
Supplement: S1 (10.1371/journal.pcbi.1002189.s001) [file journal.pcbi.1002189.s001]

**Table S1.** Molecular structures and biological activities of ligands used for model training. Structural details of the 20 ligands adopted for ligand-based studies are listed within this table. Experimental bioactivity values for each ligand were adapted from Ref [53].

| 6-11  1  2-5 | | | |
| --- | --- | --- | --- |
| 12-15  16-20 | | | |
| Name | R | R1 | pIC50 |
| 1 | pyridine-4-yl | -NHCO(2-chlorophenyl) | 6.620 |
| 2 | phenyl | -NHCO(2-chlorophenyl) | 7.081 |
| 3 | phenyl | -NHCOPh | 7.260 |
| 4* | phenyl | NO2 | 6.638 |
| 5 | 4-morpholinophenyl | -NHCOPh | 8.102 |
| 6 | 2,6-difluorobenzenyl | - | 8.721 |
| 7 | -CH2(cyclohexanyl) | - | 6.060 |
| 8 | -CH2(cyclopentanyl) | - | 6.180 |
| 9 | NHPh | - | 7.000 |
| 10 | -OPh | - | 6.721 |
| 11 | benzyl | - | 7.201 |
| 12* | H | 4-morpholinyl | 8.208 |
| 13 | -CH2CH2NH(CH2)2 | H | 9.108 |
| 14 | 4-ethylpiperazinyl | H | 9.018 |
| 15 | -CH2CH2NHCH2- | | 8.638 |
| 16* | H | 4-morpholinyl | 7.252 |
| 17 | -CH2CH2NH(CH3)CH2- | | 7.244 |
| 18 | 4-ethylpiperazinyl | H | 7.796 |
| 19 | H | -CH2CH2NH(CH2)2 | 7.620 |
| 20 | -CH2CH2NHCH2- | | 8.194 |
